# Supplementary material for: Highly covalent metal–ligand π bonding in chelated bis- and tris(iminoxolene) complexes of osmium and ruthenium
Source: Royal Society of Chemistry journal article supplement (doi:10.1039/d0dt01287d), 2020-01-01
Supplement: d0dt01287d1.pdf [file d0dt01287d1.pdf]

**Electronic Supporting Information for**  
**Highly covalent metal-ligand  $\pi$  bonding in chelated bis- and**  
**tris(iminoxolene) complexes of osmium and ruthenium**

Jacqueline Gianino and Seth N. Brown\*

251 Nieuwland Science Hall  
Department of Chemistry and Biochemistry  
University of Notre Dame  
Notre Dame, Indiana 46556-5670 USA  
E-mail: Seth.N.Brown.114@nd.edu

*Contents:*

|             |                                                                                                        |            |
|-------------|--------------------------------------------------------------------------------------------------------|------------|
| <b>I.</b>   | <b>Figure S1. Calculated spin density plot for <i>trans</i>-[(Clip)Os(py)<sub>2</sub>]<sup>+</sup></b> | <b>S2</b>  |
| <b>II.</b>  | <b>Metrical Oxidation State data for literature Ru and Os iminoxolenes</b>                             |            |
| <b>A.</b>   | Table S1. MOS data for Ru iminoxolenes                                                                 | S3         |
| <b>B.</b>   | Table S2. MOS data for Os iminoxolenes                                                                 | S4         |
| <b>III.</b> | <b>Energies and Cartesian coordinates of calculated structures</b>                                     |            |
| <b>A.</b>   | <i>trans</i> -(Clip)Os(py) <sub>2</sub>                                                                | S5         |
| <b>B.</b>   | <i>cis</i> - $\alpha$ -(Clip)Os(py) <sub>2</sub>                                                       | S6         |
| <b>C.</b>   | <i>trans</i> -(Clip)Os(CO) <sub>2</sub>                                                                | S7         |
| <b>D.</b>   | <i>cis</i> - $\alpha$ -(Clip)Os(CO) <sub>2</sub>                                                       | S9         |
| <b>E.</b>   | <i>cis</i> - $\beta$ -(Clip)OsCl <sub>2</sub>                                                          | S10        |
| <b>F.</b>   | <i>cis</i> - $\alpha$ -(Clip)OsCl <sub>2</sub>                                                         | S11        |
| <b>G.</b>   | <i>trans</i> -(Clip)OsCl <sub>2</sub>                                                                  | S12        |
| <b>H.</b>   | (Clamp)Os                                                                                              | S14        |
| <b>I.</b>   | (Clamp)Ru                                                                                              | S15        |
| <b>J.</b>   | <i>trans</i> -[(Clip)Os(py) <sub>2</sub> ] <sup>+</sup>                                                | S17        |
|             | <b>References</b>                                                                                      | <b>S19</b> |

I. Figure S1. Calculated spin density plot for *trans*-[(Clip)Os(py)<sub>2</sub>]<sup>+</sup>

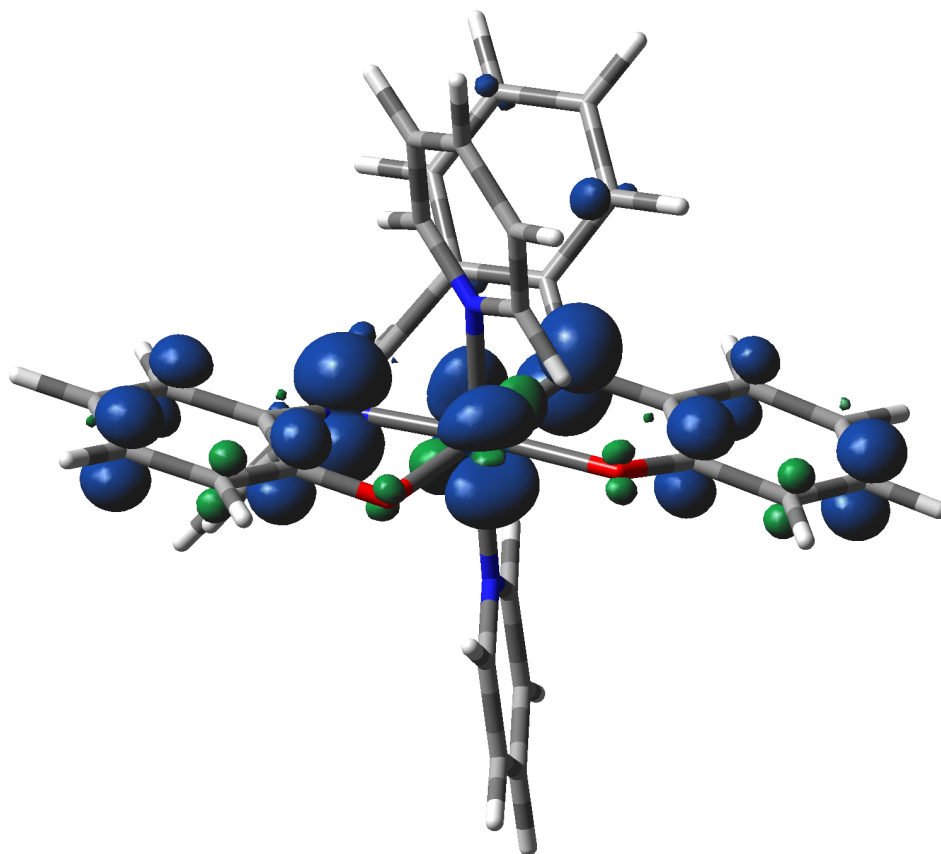

## II. Metrical Oxidation State data for literature Ru and Os iminoxolenes

**Table S1.** Metrical oxidation state (MOS) data on ruthenium iminoxolene complexes  $[\text{Ru}(\text{RNC}_6\text{H}_2^t\text{Bu}_2\text{O})_n\text{L}_m]^{x+}$ .

| CSD<br>refcode | R                                                        | <i>n</i> | <i>L<sub>m</sub></i>                                     | <i>x</i> | $\pi$ bond<br>order | MOS                                                                        | Reference |
|----------------|----------------------------------------------------------|----------|----------------------------------------------------------|----------|---------------------|----------------------------------------------------------------------------|-----------|
| BERYII         | Ph                                                       | 2        | PhN=NPpy                                                 | 1        | 0.75                | -0.87(6)                                                                   | S1        |
| BERYOO         | 3,5-Cl <sub>2</sub> C <sub>6</sub> H <sub>3</sub>        | 2        | PhN=NPpy                                                 | 0        | 0.50                | -1.13(6)<br>-1.45(13)                                                      | S1        |
| BUQCIA         | Ph                                                       | 1        | (PhN=NPpy) <sub>2</sub>                                  | 1        | 0.50                | -1.04(30) <sup>a</sup>                                                     | S2        |
| ETIMEEA        | Ph                                                       | 1        | Tpm, Cl                                                  | 1        | 1.00                | -0.92(12)                                                                  | S3        |
| ETIMIE         | 3,5-<br>(MeO) <sub>2</sub> C <sub>6</sub> H <sub>3</sub> | 1        | Tpm, Cl                                                  | 1        | 1.00                | -0.66(5)                                                                   | S3        |
| HABHUP         | Ph                                                       | 1        | (acac) <sub>2</sub>                                      | 0        | 1.00                | -0.95(10)                                                                  | S4        |
| HABJAX         | Ph                                                       | 3        | —                                                        | 0        | 0.67                | -1.33(19) <sup>a</sup><br>-1.15(25) <sup>a</sup><br>-1.37(18) <sup>a</sup> | S4        |
| ISOKAE         | 2-PhSC <sub>6</sub> H <sub>4</sub>                       | 1        | (Ph <sub>3</sub> P)Cl <sub>2</sub>                       | 0        | 1.00                | -0.88(7)                                                                   | S5        |
| IXOPOB         | 3,5-Cl <sub>2</sub> C <sub>6</sub> H <sub>3</sub>        | 2        | bpy                                                      | 0        | 0.50                | -1.48(16) <sup>a</sup><br>-1.39(7)                                         | S6        |
| IXOPUH         | 3,5-Cl <sub>2</sub> C <sub>6</sub> H <sub>3</sub>        | 2        | bpy                                                      | 0        | 0.50                | -1.42(11)<br>-1.48(11)                                                     | S6        |
| IXOQAO         | 3,5-<br>(MeO) <sub>2</sub> C <sub>6</sub> H <sub>3</sub> | 2        | bpy                                                      | 0        | 0.50                | -1.47(6)<br>-1.45(14)                                                      | S6        |
| IXOQES         | 3,5-<br>(MeO) <sub>2</sub> C <sub>6</sub> H <sub>3</sub> | 2        | bpy                                                      | 2        | 1.00                | -0.51(6)<br>-0.52(7)                                                       | S6        |
| JIWQAH         | Ph                                                       | 1        | (PhNC <sub>6</sub> H <sub>4</sub> NH)<br>Cl <sub>2</sub> | 0        | 1.00                | -0.74(9)                                                                   | S7        |
| NEFVAX         | 2-<br>CH <sub>3</sub> SC <sub>6</sub> H <sub>4</sub>     | 2        | —                                                        | 0        | 0.50                | -1.51(10)<br>-1.40(13)                                                     | S8        |
| ORESEL         | CMe <sub>2</sub> -2-<br>C <sub>5</sub> H <sub>4</sub> N  | 1        | (Ph <sub>3</sub> P)Cl <sub>2</sub>                       | 0        | 1.00                | -0.66(9)                                                                   | S9        |
| ORESOF         | CMe <sub>2</sub> -2-<br>C <sub>5</sub> H <sub>4</sub> N  | 1        | (Ph <sub>3</sub> P)Cl <sub>2</sub>                       | 0        | 1.00                | -0.79(9)                                                                   | S9        |
| ORESOF         | CMe <sub>2</sub> -2-<br>C <sub>5</sub> H <sub>4</sub> N  | 1        | (Ph <sub>3</sub> PN)( $\mu$ -N)                          | 0        | 0.00                | -1.98(10)                                                                  | S9        |
|                |                                                          | 1        | (Ph <sub>3</sub> PN)( $\mu$ -N)                          | 0        | 0.00                | -1.77(9)                                                                   |           |
|                |                                                          | 1        | ( $\mu$ -N) <sub>2</sub>                                 | 0        | 0.00                | -1.81(6)                                                                   |           |
| SUQYUZ         | Ph                                                       | 1        | (tpy)(NO)                                                | 2        | 1.00                | -1.10(12)                                                                  | S10       |
| UHUUWUQ        | Ph                                                       | 1        | ( $\mu$ -tppz)Cl                                         | 1        | 1.00                | -0.63(12)                                                                  | S11       |
| UKOMIR         | 2-CF <sub>3</sub> C <sub>6</sub> H <sub>4</sub>          | 1        | cymene                                                   | 0        | <i>b</i>            | -1.62(10) <sup>b</sup>                                                     | S12       |
| UWUZIWF        | Ph                                                       | 1        | (tpy)(OAc)                                               | 1        | 1.00                | -0.70(7)                                                                   | S13       |
| YAYLIWF        | 2-(SOOEt)-<br>C <sub>6</sub> H <sub>4</sub>              | 1        | (Ph <sub>3</sub> P)Cl <sub>2</sub>                       | 0        | 1.00                | -0.69(11)                                                                  | S14       |
| ZORLOJ         | 2-MeSC <sub>6</sub> H <sub>4</sub>                       | 1        | cymene                                                   | 0        | <i>b</i>            | -1.57(12) <sup>b</sup>                                                     | S15       |

|        |                                                        |   |        |   |          |                                                                |     |
|--------|--------------------------------------------------------|---|--------|---|----------|----------------------------------------------------------------|-----|
| ZORLUP | 3-CF <sub>3</sub> C <sub>6</sub> H <sub>4</sub>        | 1 | cymene | 0 | <i>b</i> | -1.56(10) <sup><i>b</i></sup>                                  | S15 |
| ZORMAW | Ph                                                     | 1 | cymene | 0 | <i>b</i> | -1.65(10) <sup><i>b</i></sup><br>-1.60(7) <sup><i>b</i></sup>  | S15 |
| ZORMEA | 2-EtC <sub>6</sub> H <sub>4</sub>                      | 1 | cymene | 0 | <i>b</i> | -1.51(12) <sup><i>b</i></sup><br>-1.58(11) <sup><i>b</i></sup> | S15 |
| ZORMIE | 2-MeOC <sub>6</sub> H <sub>4</sub>                     | 1 | cymene | 0 | <i>b</i> | -1.67(10) <sup><i>b</i></sup>                                  | S15 |
| ZORMOK | 2-MeSC <sub>6</sub> H <sub>4</sub>                     | 2 | —      | 1 | 0.75     | -1.04(4)<br>-0.95(5)                                           | S15 |
| ZORMUQ | 2-CH <sub>3</sub> Se-<br>C <sub>6</sub> H <sub>4</sub> | 1 | cymene | 0 | <i>b</i> | -1.63(14) <sup><i>b</i></sup>                                  | S15 |
| ZORNAX | 2-CH <sub>3</sub> Se-<br>C <sub>6</sub> H <sub>4</sub> | 1 | cymene | 1 | 0.50     | -1.16(8)                                                       | S15 |
| ZORNEB | 2-MeSC <sub>6</sub> H <sub>4</sub>                     | 1 | cymene | 1 | 0.50     | -1.18(9)<br>-1.23(7)                                           | S15 |

<sup>a</sup>Not included in correlation analysis due to poor fit of structural data to MOS correlations, as indicated by the high estimated standard deviations (> 0.15). <sup>b</sup>(Arene)Ru(iminoxolene) complex, not included in correlation due to uncertain  $\pi$  bond order, see text.

**Table S2.** Metrical oxidation state (MOS) data on osmium iminoxolene complexes [Os(RNC<sub>6</sub>H<sub>2</sub><sup>*t*</sup>Bu<sub>2</sub>O)<sub>*n*</sub>L<sub>*m*</sub>]<sup>*x+*</sup>.

| CSD<br>refcode | R                                                                         | <i>n</i> | L <sub><i>m</i></sub>               | <i>x</i> | $\pi$ bond<br>order | MOS                                        | Reference |
|----------------|---------------------------------------------------------------------------|----------|-------------------------------------|----------|---------------------|--------------------------------------------|-----------|
| GEGZID         | Ph                                                                        | 3        | —                                   | 0        | 0.67                | -1.53(11)<br>-1.39(9)<br>-1.35(8)          | S16       |
| GIFHOU         | Ph                                                                        | 2        | bpy                                 | 1        | 0.75                | -1.26(7)<br>-1.44(18) <sup><i>a</i></sup>  | S17       |
| IBOGIR         | Ph                                                                        | 1        | (PhN=NP <sub>y</sub> ) <sub>2</sub> | 0        | <i>b</i>            | -1.43(13)                                  | S18       |
| IBOGOX         | 3,5-Cl <sub>2</sub> C <sub>6</sub> H <sub>3</sub>                         | 1        | (PhN=NP <sub>y</sub> ) <sub>2</sub> | 0        | <i>b</i>            | -1.66(16) <sup><i>a</i></sup>              | S18       |
| IBOGUD         | 3,5-<br>(MeO) <sub>2</sub> C <sub>6</sub> H <sub>3</sub>                  | 1        | (PhN=NP <sub>y</sub> ) <sub>2</sub> | 0        | <i>b</i>            | -1.65(17) <sup><i>a</i></sup>              | S18       |
| IBOHAK         | 3,5-<br><sup><i>t</i></sup> Bu <sub>2</sub> C <sub>6</sub> H <sub>3</sub> | 1        | (PhN=NP <sub>y</sub> ) <sub>2</sub> | 0        | <i>b</i>            | -1.49(10)                                  | S18       |
| IBOHEO         | 3,5-<br>(MeO) <sub>2</sub> C <sub>6</sub> H <sub>3</sub>                  | 1        | (PhN=NP <sub>y</sub> ) <sub>2</sub> | 2        | <i>b</i>            | -0.58(8)                                   | S18       |
| ICIHEJ         | CH(CN)(5-<br>ClC <sub>6</sub> H <sub>3</sub> O)                           | 1        | (N)(CN) <sub>2</sub>                | 2-       | 0.00                | -1.88(12)                                  | S19       |
| NEFVEB         | 2-<br>CH <sub>3</sub> SC <sub>6</sub> H <sub>4</sub>                      | 2        | —                                   | 0        | 0.50                | -1.66(17) <sup><i>a</i></sup><br>-1.59(11) | S8        |

<sup>a</sup>Not included in correlation analysis due to poor fit of structural data to MOS correlations, as indicated by the high estimated standard deviations (> 0.15). <sup>b</sup>Not included in correlation due to uncertain  $\pi$  bond order, see text.

### III. Energies and Cartesian coordinates of calculated structures

#### A. *trans*-(Clip)Os(py)<sub>2</sub>

Energy of optimized structure = -1771.52918972 a.u.

Cartesian coordinates of optimized structure:

| Center<br>Number | Atomic<br>Number | Coordinates (Å) |           |           |
|------------------|------------------|-----------------|-----------|-----------|
|                  |                  | X               | Y         | Z         |
| 1                | 76               | 0.000000        | 0.000000  | 0.731268  |
| 2                | 8                | 1.531183        | -0.306262 | 2.105437  |
| 3                | 7                | 1.576174        | -0.202982 | -0.493774 |
| 4                | 6                | 2.606635        | -0.830770 | 1.536456  |
| 5                | 6                | 2.696419        | -0.775461 | 0.107083  |
| 6                | 6                | 3.839135        | -1.282720 | -0.541001 |
| 7                | 1                | 3.898234        | -1.251654 | -1.625294 |
| 8                | 6                | 4.875332        | -1.831506 | 0.206642  |
| 9                | 1                | 5.748688        | -2.234201 | -0.299107 |
| 10               | 6                | 4.792026        | -1.877058 | 1.609695  |
| 11               | 1                | 5.608104        | -2.308529 | 2.183874  |
| 12               | 6                | 3.673993        | -1.382323 | 2.271118  |
| 13               | 1                | 3.595831        | -1.410209 | 3.354368  |
| 14               | 6                | 0.593721        | 0.455531  | -2.661297 |
| 15               | 6                | 1.655795        | 0.493512  | -1.707112 |
| 16               | 6                | 2.778039        | 1.313293  | -1.965509 |
| 17               | 1                | 3.570089        | 1.338338  | -1.224525 |
| 18               | 6                | 2.867704        | 2.098916  | -3.105299 |
| 19               | 1                | 3.736824        | 2.734009  | -3.256004 |
| 20               | 6                | 1.825996        | 2.084448  | -4.037107 |
| 21               | 1                | 1.870075        | 2.702025  | -4.929866 |
| 22               | 6                | 0.723221        | 1.269347  | -3.808151 |
| 23               | 1                | -0.084952       | 1.255269  | -4.533754 |
| 24               | 7                | 0.259696        | 2.111282  | 0.829713  |
| 25               | 6                | -0.125959       | 2.963619  | -0.142944 |
| 26               | 1                | -0.542457       | 2.507004  | -1.031009 |
| 27               | 6                | 0.000000        | 4.342954  | -0.017420 |
| 28               | 1                | -0.325870       | 4.982788  | -0.830823 |
| 29               | 6                | 0.540862        | 4.871863  | 1.153281  |
| 30               | 1                | 0.648969        | 5.945356  | 1.279174  |
| 31               | 6                | 0.940034        | 3.991840  | 2.159069  |
| 32               | 1                | 1.367730        | 4.351794  | 3.089108  |
| 33               | 6                | 0.785031        | 2.624247  | 1.965073  |
| 34               | 1                | 1.088178        | 1.892649  | 2.705158  |
| 35               | 8                | -1.531183       | 0.306262  | 2.105437  |
| 36               | 7                | -1.576174       | 0.202982  | -0.493774 |
| 37               | 6                | -2.606635       | 0.830770  | 1.536456  |
| 38               | 6                | -2.696419       | 0.775461  | 0.107083  |
| 39               | 6                | -3.839135       | 1.282720  | -0.541001 |
| 40               | 1                | -3.898234       | 1.251654  | -1.625294 |
| 41               | 6                | -4.875332       | 1.831506  | 0.206642  |
| 42               | 1                | -5.748688       | 2.234201  | -0.299107 |
| 43               | 6                | -4.792026       | 1.877058  | 1.609695  |
| 44               | 1                | -5.608104       | 2.308529  | 2.183874  |
| 45               | 6                | -3.673993       | 1.382323  | 2.271118  |

|    |   |           |           |           |
|----|---|-----------|-----------|-----------|
| 46 | 1 | -3.595831 | 1.410209  | 3.354368  |
| 47 | 6 | -0.593721 | -0.455531 | -2.661297 |
| 48 | 6 | -1.655795 | -0.493512 | -1.707112 |
| 49 | 6 | -2.778039 | -1.313293 | -1.965509 |
| 50 | 1 | -3.570089 | -1.338338 | -1.224525 |
| 51 | 6 | -2.867704 | -2.098916 | -3.105299 |
| 52 | 1 | -3.736824 | -2.734009 | -3.256004 |
| 53 | 6 | -1.825996 | -2.084448 | -4.037107 |
| 54 | 1 | -1.870075 | -2.702025 | -4.929866 |
| 55 | 6 | -0.723221 | -1.269347 | -3.808151 |
| 56 | 1 | 0.084952  | -1.255269 | -4.533754 |
| 57 | 7 | -0.259696 | -2.111282 | 0.829713  |
| 58 | 6 | 0.125959  | -2.963619 | -0.142944 |
| 59 | 1 | 0.542457  | -2.507004 | -1.031009 |
| 60 | 6 | 0.000000  | -4.342954 | -0.017420 |
| 61 | 1 | 0.325870  | -4.982788 | -0.830823 |
| 62 | 6 | -0.540862 | -4.871863 | 1.153281  |
| 63 | 1 | -0.648969 | -5.945356 | 1.279174  |
| 64 | 6 | -0.940034 | -3.991840 | 2.159069  |
| 65 | 1 | -1.367730 | -4.351794 | 3.089108  |
| 66 | 6 | -0.785031 | -2.624247 | 1.965073  |
| 67 | 1 | -1.088178 | -1.892649 | 2.705158  |

**B.** *cis*- $\alpha$ -(Clip)Os(py)<sub>2</sub>

Energy of optimized structure = -1771.50421986 a.u.

Cartesian coordinates of optimized structure:

| Center<br>Number | Atomic<br>Number | Coordinates (Angstroms) |           |           |
|------------------|------------------|-------------------------|-----------|-----------|
|                  |                  | X                       | Y         | Z         |
| 1                | 76               | -0.624801               | 0.000268  | 0.000045  |
| 2                | 8                | -0.777880               | 1.152690  | -1.662880 |
| 3                | 8                | -0.778991               | -1.152017 | 1.662910  |
| 4                | 7                | 0.870411                | -1.367586 | -0.327446 |
| 5                | 7                | 0.871277                | 1.367068  | 0.327727  |
| 6                | 6                | 0.768975                | -2.477534 | 0.474523  |
| 7                | 6                | 0.326933                | -4.571666 | 2.308092  |
| 8                | 1                | 0.161139                | -5.390400 | 3.003037  |
| 9                | 6                | 0.330978                | 4.571351  | -2.308187 |
| 10               | 1                | 0.166011                | 5.390156  | -3.003246 |
| 11               | 6                | 2.029587                | -1.147176 | -1.122337 |
| 12               | 6                | 1.311178                | 4.690309  | -1.304193 |
| 13               | 1                | 1.895216                | 5.603968  | -1.229273 |
| 14               | 6                | -0.197198               | -2.344693 | 1.528234  |
| 15               | 6                | 0.770911                | 2.477035  | -0.474359 |
| 16               | 6                | 1.543406                | 3.658801  | -0.404506 |
| 17               | 1                | 2.301411                | 3.757038  | 0.366062  |
| 18               | 6                | 2.030277                | 1.145773  | 1.122655  |
| 19               | 6                | 2.114107                | 1.750544  | 2.384702  |
| 20               | 1                | 1.291997                | 2.383074  | 2.708014  |
| 21               | 6                | -0.416594               | -3.403097 | 2.425224  |
| 22               | 1                | -1.150281               | -3.272720 | 3.216368  |

|    |   |           |           |           |
|----|---|-----------|-----------|-----------|
| 23 | 6 | 1.540504  | -3.659939 | 0.404740  |
| 24 | 1 | 2.298596  | -3.758741 | -0.365674 |
| 25 | 6 | 2.113094  | -1.752063 | -2.384351 |
| 26 | 1 | 1.290610  | -2.384103 | -2.707667 |
| 27 | 6 | -0.413494 | 3.403392  | -2.425365 |
| 28 | 1 | -1.147115 | 3.273541  | -3.216656 |
| 29 | 6 | -0.195150 | 2.344890  | -1.528226 |
| 30 | 6 | 3.223827  | 1.553584  | 3.205889  |
| 31 | 1 | 3.267448  | 2.031407  | 4.181125  |
| 32 | 6 | 3.085324  | -0.322079 | -0.671981 |
| 33 | 6 | 4.267647  | -0.740455 | -2.770133 |
| 34 | 1 | 5.134289  | -0.570108 | -3.403011 |
| 35 | 6 | 3.222952  | -1.555812 | -3.205525 |
| 36 | 1 | 3.266296  | -2.033695 | -4.180744 |
| 37 | 6 | 4.268034  | 0.737612  | 2.770476  |
| 38 | 1 | 5.134552  | 0.566697  | 3.403369  |
| 39 | 6 | 4.191197  | 0.131559  | 1.517459  |
| 40 | 1 | 4.996481  | -0.516111 | 1.181029  |
| 41 | 6 | 4.191153  | -0.134297 | -1.517146 |
| 42 | 1 | 4.996832  | 0.512873  | -1.180711 |
| 43 | 6 | 1.307239  | -4.691333 | 1.304291  |
| 44 | 1 | 1.890548  | -5.605461 | 1.229413  |
| 45 | 6 | 3.085505  | 0.320056  | 0.672271  |
| 46 | 7 | -2.083134 | -1.289499 | -0.864509 |
| 47 | 6 | -3.036607 | -1.930575 | -0.147609 |
| 48 | 1 | -3.002070 | -1.765399 | 0.922320  |
| 49 | 6 | -3.986574 | -2.755865 | -0.736422 |
| 50 | 1 | -4.724261 | -3.247396 | -0.110218 |
| 51 | 6 | -3.970920 | -2.937444 | -2.120196 |
| 52 | 1 | -4.701426 | -3.577053 | -2.606527 |
| 53 | 6 | -2.991133 | -2.277051 | -2.861354 |
| 54 | 1 | -2.931309 | -2.383493 | -3.939832 |
| 55 | 6 | -2.066322 | -1.471333 | -2.206920 |
| 56 | 1 | -1.293440 | -0.931018 | -2.739175 |
| 57 | 7 | -2.082524 | 1.290911  | 0.864227  |
| 58 | 6 | -3.035110 | 1.933003  | 0.147049  |
| 59 | 1 | -3.000142 | 1.768177  | -0.922921 |
| 60 | 6 | -3.984730 | 2.758839  | 0.735656  |
| 61 | 1 | -4.721692 | 3.251178  | 0.109234  |
| 62 | 6 | -3.969664 | 2.939921  | 2.119500  |
| 63 | 1 | -4.699913 | 3.579950  | 2.605664  |
| 64 | 6 | -2.990803 | 2.278482  | 2.860944  |
| 65 | 1 | -2.931461 | 2.384496  | 3.939492  |
| 66 | 6 | -2.066287 | 1.472263  | 2.206714  |
| 67 | 1 | -1.294122 | 0.931146  | 2.739181  |

---

### C. *trans*-(Clip)Os(CO)<sub>2</sub>

Energy of optimized structure = -1501.59695080 a.u.

Cartesian coordinates of optimized structure:

| Center<br>Number | Atomic<br>Number | Coordinates (Angstroms) |           |           |
|------------------|------------------|-------------------------|-----------|-----------|
|                  |                  | X                       | Y         | Z         |
| 1                | 76               | 0.000000                | 0.000000  | 0.954604  |
| 2                | 8                | -0.286035               | 1.566970  | 2.320344  |
| 3                | 7                | -0.405187               | 1.557613  | -0.291217 |
| 4                | 6                | -0.179041               | 2.744193  | 1.736386  |
| 5                | 6                | -0.261867               | 2.798703  | 0.301242  |
| 6                | 6                | -0.204388               | 4.046202  | -0.357849 |
| 7                | 1                | -0.245026               | 4.080776  | -1.442120 |
| 8                | 6                | -0.068015               | 5.208701  | 0.383953  |
| 9                | 1                | -0.000477               | 6.166072  | -0.124458 |
| 10               | 6                | 0.000000                | 5.156617  | 1.792713  |
| 11               | 1                | 0.106436                | 6.078852  | 2.357434  |
| 12               | 6                | -0.058111               | 3.946321  | 2.465371  |
| 13               | 1                | -0.007699               | 3.890072  | 3.548317  |
| 14               | 6                | -0.642678               | 0.380807  | -2.448165 |
| 15               | 6                | -1.072431               | 1.363329  | -1.504427 |
| 16               | 6                | -2.240305               | 2.115121  | -1.771219 |
| 17               | 1                | -2.558171               | 2.843378  | -1.032298 |
| 18               | 6                | -2.998453               | 1.905899  | -2.912024 |
| 19               | 1                | -3.906481               | 2.481031  | -3.070197 |
| 20               | 6                | -2.600498               | 0.933164  | -3.834250 |
| 21               | 1                | -3.190048               | 0.741565  | -4.726065 |
| 22               | 6                | -1.442533               | 0.202514  | -3.597916 |
| 23               | 1                | -1.134659               | -0.549219 | -4.318242 |
| 24               | 6                | -1.924205               | -0.490269 | 1.000107  |
| 25               | 8                | -3.032203               | -0.774232 | 1.060614  |
| 26               | 8                | 0.286035                | -1.566970 | 2.320344  |
| 27               | 7                | 0.405187                | -1.557613 | -0.291217 |
| 28               | 6                | 0.179041                | -2.744193 | 1.736386  |
| 29               | 6                | 0.261867                | -2.798703 | 0.301242  |
| 30               | 6                | 0.204388                | -4.046202 | -0.357849 |
| 31               | 1                | 0.245026                | -4.080776 | -1.442120 |
| 32               | 6                | 0.068015                | -5.208701 | 0.383953  |
| 33               | 1                | 0.000477                | -6.166072 | -0.124458 |
| 34               | 6                | 0.000000                | -5.156617 | 1.792713  |
| 35               | 1                | -0.106436               | -6.078852 | 2.357434  |
| 36               | 6                | 0.058111                | -3.946321 | 2.465371  |
| 37               | 1                | 0.007699                | -3.890072 | 3.548317  |
| 38               | 6                | 0.642678                | -0.380807 | -2.448165 |
| 39               | 6                | 1.072431                | -1.363329 | -1.504427 |
| 40               | 6                | 2.240305                | -2.115121 | -1.771219 |
| 41               | 1                | 2.558171                | -2.843378 | -1.032298 |
| 42               | 6                | 2.998453                | -1.905899 | -2.912024 |
| 43               | 1                | 3.906481                | -2.481031 | -3.070197 |
| 44               | 6                | 2.600498                | -0.933164 | -3.834250 |
| 45               | 1                | 3.190048                | -0.741565 | -4.726065 |
| 46               | 6                | 1.442533                | -0.202514 | -3.597916 |
| 47               | 1                | 1.134659                | 0.549219  | -4.318242 |
| 48               | 6                | 1.924205                | 0.490269  | 1.000107  |
| 49               | 8                | 3.032203                | 0.774232  | 1.060614  |



**D.** *cis*- $\alpha$ -(Clip)Os(CO)<sub>2</sub>

Energy of optimized structure = -1501.60494051 a.u.

Cartesian coordinates of optimized structure:

| Center<br>Number | Atomic<br>Number | Coordinates (Angstroms) |           |           |
|------------------|------------------|-------------------------|-----------|-----------|
|                  |                  | X                       | Y         | Z         |
| 1                | 76               | 0.000000                | 0.000000  | 1.519969  |
| 2                | 8                | -0.673918               | 1.967415  | 1.419229  |
| 3                | 7                | 1.087406                | 0.763219  | -0.157270 |
| 4                | 6                | 0.899020                | 2.097037  | -0.342585 |
| 5                | 6                | 0.000000                | 2.730808  | 0.598562  |
| 6                | 6                | -0.205720               | 4.127920  | 0.538949  |
| 7                | 1                | -0.875691               | 4.580463  | 1.263089  |
| 8                | 6                | 0.416676                | 4.869377  | -0.446871 |
| 9                | 1                | 0.254028                | 5.942385  | -0.497069 |
| 10               | 6                | 1.258824                | 4.247184  | -1.403150 |
| 11               | 1                | 1.741587                | 4.853076  | -2.164476 |
| 12               | 6                | 1.484699                | 2.886423  | -1.369727 |
| 13               | 1                | 2.145873                | 2.413606  | -2.088023 |
| 14               | 6                | 0.700415                | -0.250007 | -2.369022 |
| 15               | 6                | 1.548629                | -0.017239 | -1.256413 |
| 16               | 6                | 2.838002                | -0.555286 | -1.229474 |
| 17               | 1                | 3.460188                | -0.375546 | -0.357899 |
| 18               | 6                | 3.319243                | -1.288130 | -2.315673 |
| 19               | 1                | 4.326936                | -1.693011 | -2.288319 |
| 20               | 6                | 2.506462                | -1.494354 | -3.430723 |
| 21               | 1                | 2.874596                | -2.065094 | -4.278603 |
| 22               | 6                | 1.206391                | -0.986612 | -3.447730 |
| 23               | 1                | 0.558534                | -1.183024 | -4.297910 |
| 24               | 6                | -1.323388               | -0.427973 | 2.825643  |
| 25               | 8                | -2.179598               | -0.637252 | 3.573338  |
| 26               | 8                | 0.673918                | -1.967415 | 1.419229  |
| 27               | 7                | -1.087406               | -0.763219 | -0.157270 |
| 28               | 6                | -0.899020               | -2.097037 | -0.342585 |
| 29               | 6                | 0.000000                | -2.730808 | 0.598562  |
| 30               | 6                | 0.205720                | -4.127920 | 0.538949  |
| 31               | 1                | 0.875691                | -4.580463 | 1.263089  |
| 32               | 6                | -0.416676               | -4.869377 | -0.446871 |
| 33               | 1                | -0.254028               | -5.942385 | -0.497069 |
| 34               | 6                | -1.258824               | -4.247184 | -1.403150 |
| 35               | 1                | -1.741587               | -4.853076 | -2.164476 |
| 36               | 6                | -1.484699               | -2.886423 | -1.369727 |
| 37               | 1                | -2.145873               | -2.413606 | -2.088023 |
| 38               | 6                | -0.700415               | 0.250007  | -2.369022 |
| 39               | 6                | -1.548629               | 0.017239  | -1.256413 |
| 40               | 6                | -2.838002               | 0.555286  | -1.229474 |

|    |   |           |          |           |
|----|---|-----------|----------|-----------|
| 41 | 1 | -3.460188 | 0.375546 | -0.357899 |
| 42 | 6 | -3.319243 | 1.288130 | -2.315673 |
| 43 | 1 | -4.326936 | 1.693011 | -2.288319 |
| 44 | 6 | -2.506462 | 1.494354 | -3.430723 |
| 45 | 1 | -2.874596 | 2.065094 | -4.278603 |
| 46 | 6 | -1.206391 | 0.986612 | -3.447730 |
| 47 | 1 | -0.558534 | 1.183024 | -4.297910 |
| 48 | 6 | 1.323388  | 0.427973 | 2.825643  |
| 49 | 8 | 2.179598  | 0.637252 | 3.573338  |

-----

### E. *cis*- $\beta$ -(Clip)OsCl<sub>2</sub>

Energy of optimized structure = -2195.34617634 a.u.

Cartesian coordinates of optimized structure:

-----

| Center<br>Number | Atomic<br>Number | Coordinates (Å) |           |           |
|------------------|------------------|-----------------|-----------|-----------|
|                  |                  | X               | Y         | Z         |
| 1                | 76               | 0.013191        | 0.053191  | -0.009511 |
| 2                | 17               | 0.376645        | 2.092475  | -1.166675 |
| 3                | 17               | -2.293382       | 0.240726  | -0.548639 |
| 4                | 8                | 2.036538        | 0.055112  | 0.254512  |
| 5                | 7                | 0.599301        | -1.063960 | -1.511928 |
| 6                | 8                | -0.401365       | 0.994999  | 1.783301  |
| 7                | 7                | -0.439496       | -1.496316 | 1.160879  |
| 8                | 6                | 2.688101        | -0.348645 | -0.799422 |
| 9                | 6                | 1.922149        | -1.024348 | -1.819222 |
| 10               | 6                | 2.579717        | -1.637236 | -2.915789 |
| 11               | 1                | 2.001039        | -2.164553 | -3.666260 |
| 12               | 6                | 3.947674        | -1.512277 | -3.019054 |
| 13               | 1                | 4.464859        | -1.947292 | -3.868912 |
| 14               | 6                | 4.699757        | -0.814834 | -2.032370 |
| 15               | 1                | 5.776683        | -0.735897 | -2.151089 |
| 16               | 6                | 4.093973        | -0.247176 | -0.932092 |
| 17               | 1                | 4.655310        | 0.274778  | -0.164589 |
| 18               | 6                | -1.098753       | 0.250451  | 2.579954  |
| 19               | 6                | -1.151133       | -1.163193 | 2.280179  |
| 20               | 6                | -1.860359       | -2.042809 | 3.140118  |
| 21               | 1                | -1.929227       | -3.096738 | 2.895430  |
| 22               | 6                | -2.484725       | -1.530857 | 4.255220  |
| 23               | 1                | -3.056687       | -2.189410 | 4.901654  |
| 24               | 6                | -2.404326       | -0.144812 | 4.567476  |
| 25               | 1                | -2.906993       | 0.224189  | 5.457179  |
| 26               | 6                | -1.719132       | 0.735097  | 3.760138  |
| 27               | 1                | -1.657632       | 1.796025  | 3.977373  |
| 28               | 6                | -0.316974       | -1.944752 | -2.164355 |

|    |   |           |           |           |
|----|---|-----------|-----------|-----------|
| 29 | 6 | -0.754734 | -3.092658 | -1.477603 |
| 30 | 6 | -1.734811 | -3.883362 | -2.097627 |
| 31 | 1 | -2.093372 | -4.769648 | -1.581910 |
| 32 | 6 | -2.257056 | -3.548803 | -3.346381 |
| 33 | 1 | -3.024883 | -4.173119 | -3.794083 |
| 34 | 6 | -1.796123 | -2.413410 | -4.012847 |
| 35 | 1 | -2.201606 | -2.141253 | -4.982898 |
| 36 | 6 | -0.826616 | -1.606424 | -3.418861 |
| 37 | 1 | -0.485127 | -0.694540 | -3.898141 |
| 38 | 6 | 0.020943  | -2.839228 | 0.993115  |
| 39 | 6 | -0.114842 | -3.568848 | -0.215116 |
| 40 | 6 | 0.394648  | -4.880425 | -0.236302 |
| 41 | 1 | 0.298376  | -5.447695 | -1.156927 |
| 42 | 6 | 1.031752  | -5.457400 | 0.859150  |
| 43 | 1 | 1.417819  | -6.470248 | 0.789524  |
| 44 | 6 | 1.186300  | -4.716802 | 2.029943  |
| 45 | 1 | 1.701391  | -5.135249 | 2.889554  |
| 46 | 6 | 0.681896  | -3.422664 | 2.090354  |
| 47 | 1 | 0.809286  | -2.831459 | 2.990648  |

---

### F. *cis*- $\alpha$ -(Clip)OsCl<sub>2</sub>

Energy of optimized structure = -2195.34126710 a.u.

Cartesian coordinates of optimized structure:

---

| Center<br>Number | Atomic<br>Number | Atomic<br>Type | Coordinates (Angstroms) |           |           |
|------------------|------------------|----------------|-------------------------|-----------|-----------|
|                  |                  |                | X                       | Y         | Z         |
| 1                | 76               | 0              | 0.000000                | 0.000000  | 1.220643  |
| 2                | 8                | 0              | -1.007900               | 1.782534  | 1.239333  |
| 3                | 7                | 0              | 0.934778                | 1.005768  | -0.209878 |
| 4                | 6                | 0              | 0.745054                | 2.352303  | -0.194866 |
| 5                | 6                | 0              | -0.332955               | 2.743548  | 0.684907  |
| 6                | 6                | 0              | -0.688433               | 4.111771  | 0.785693  |
| 7                | 1                | 0              | -1.492182               | 4.393022  | 1.457589  |
| 8                | 6                | 0              | 0.000000                | 5.035452  | 0.030501  |
| 9                | 1                | 0              | -0.254837               | 6.088553  | 0.109901  |
| 10               | 6                | 0              | 1.038693                | 4.644589  | -0.861783 |
| 11               | 1                | 0              | 1.555304                | 5.405385  | -1.439041 |
| 12               | 6                | 0              | 1.400679                | 3.322779  | -0.995061 |
| 13               | 1                | 0              | 2.196088                | 3.019880  | -1.667419 |
| 14               | 6                | 0              | 0.742095                | -0.084333 | -2.393450 |
| 15               | 6                | 0              | 1.558135                | 0.374628  | -1.334261 |
| 16               | 6                | 0              | 2.942462                | 0.199565  | -1.355622 |
| 17               | 1                | 0              | 3.528634                | 0.543264  | -0.509134 |
| 18               | 6                | 0              | 3.547054                | -0.416049 | -2.452399 |

|    |    |   |           |           |           |
|----|----|---|-----------|-----------|-----------|
| 19 | 1  | 0 | 4.624597  | -0.550818 | -2.466984 |
| 20 | 6  | 0 | 2.764325  | -0.861095 | -3.518008 |
| 21 | 1  | 0 | 3.227869  | -1.345871 | -4.372307 |
| 22 | 6  | 0 | 1.378990  | -0.698727 | -3.482089 |
| 23 | 1  | 0 | 0.769250  | -1.067007 | -4.302413 |
| 24 | 17 | 0 | -1.428180 | -0.927275 | 2.875205  |
| 25 | 8  | 0 | 1.007900  | -1.782534 | 1.239333  |
| 26 | 7  | 0 | -0.934778 | -1.005768 | -0.209878 |
| 27 | 6  | 0 | -0.745054 | -2.352303 | -0.194866 |
| 28 | 6  | 0 | 0.332955  | -2.743548 | 0.684907  |
| 29 | 6  | 0 | 0.688433  | -4.111771 | 0.785693  |
| 30 | 1  | 0 | 1.492182  | -4.393022 | 1.457589  |
| 31 | 6  | 0 | -0.000000 | -5.035452 | 0.030501  |
| 32 | 1  | 0 | 0.254837  | -6.088553 | 0.109901  |
| 33 | 6  | 0 | -1.038693 | -4.644589 | -0.861783 |
| 34 | 1  | 0 | -1.555304 | -5.405385 | -1.439041 |
| 35 | 6  | 0 | -1.400679 | -3.322779 | -0.995061 |
| 36 | 1  | 0 | -2.196088 | -3.019880 | -1.667419 |
| 37 | 6  | 0 | -0.742095 | 0.084333  | -2.393450 |
| 38 | 6  | 0 | -1.558135 | -0.374628 | -1.334261 |
| 39 | 6  | 0 | -2.942462 | -0.199565 | -1.355622 |
| 40 | 1  | 0 | -3.528634 | -0.543264 | -0.509134 |
| 41 | 6  | 0 | -3.547054 | 0.416049  | -2.452399 |
| 42 | 1  | 0 | -4.624597 | 0.550818  | -2.466984 |
| 43 | 6  | 0 | -2.764325 | 0.861095  | -3.518008 |
| 44 | 1  | 0 | -3.227869 | 1.345871  | -4.372307 |
| 45 | 6  | 0 | -1.378990 | 0.698727  | -3.482089 |
| 46 | 1  | 0 | -0.769250 | 1.067007  | -4.302413 |
| 47 | 17 | 0 | 1.428180  | 0.927275  | 2.875205  |

### G. *trans*-(Clip)OsCl<sub>2</sub>

Energy of optimized structure = -2195.33944510 a.u.

Cartesian coordinates of optimized structure:

| Center<br>Number | Atomic<br>Number | Coordinates (Angstroms) |          |           |
|------------------|------------------|-------------------------|----------|-----------|
|                  |                  | X                       | Y        | Z         |
| 1                | 76               | -0.000000               | 0.000000 | 0.922514  |
| 2                | 8                | -0.229500               | 1.620481 | 2.273051  |
| 3                | 7                | -0.325450               | 1.486852 | -0.314184 |
| 4                | 6                | -0.105436               | 2.749323 | 1.657368  |
| 5                | 6                | -0.188989               | 2.746749 | 0.213187  |
| 6                | 6                | -0.145958               | 3.964286 | -0.513242 |
| 7                | 1                | -0.189852               | 3.944585 | -1.597061 |
| 8                | 6                | 0.000000                | 5.150175 | 0.171609  |
| 9                | 1                | 0.071998                | 6.086110 | -0.373525 |

|    |    |           |           |           |
|----|----|-----------|-----------|-----------|
| 10 | 6  | 0.076718  | 5.158186  | 1.591982  |
| 11 | 1  | 0.187803  | 6.109259  | 2.106075  |
| 12 | 6  | 0.022723  | 3.994581  | 2.328066  |
| 13 | 1  | 0.082232  | 3.991922  | 3.411205  |
| 14 | 6  | -0.641193 | 0.377302  | -2.520787 |
| 15 | 6  | -1.036351 | 1.311029  | -1.537118 |
| 16 | 6  | -2.242571 | 2.020988  | -1.691283 |
| 17 | 1  | -2.554551 | 2.695035  | -0.902463 |
| 18 | 6  | -3.050852 | 1.831232  | -2.806148 |
| 19 | 1  | -3.984648 | 2.378886  | -2.891696 |
| 20 | 6  | -2.663176 | 0.925037  | -3.792222 |
| 21 | 1  | -3.285353 | 0.759200  | -4.666762 |
| 22 | 6  | -1.472697 | 0.218002  | -3.642621 |
| 23 | 1  | -1.172086 | -0.493897 | -4.405350 |
| 24 | 17 | -2.291389 | -0.396300 | 1.266247  |
| 25 | 8  | 0.229500  | -1.620481 | 2.273051  |
| 26 | 7  | 0.325450  | -1.486852 | -0.314184 |
| 27 | 6  | 0.105436  | -2.749323 | 1.657368  |
| 28 | 6  | 0.188989  | -2.746749 | 0.213187  |
| 29 | 6  | 0.145958  | -3.964286 | -0.513242 |
| 30 | 1  | 0.189852  | -3.944585 | -1.597061 |
| 31 | 6  | -0.000000 | -5.150175 | 0.171609  |
| 32 | 1  | -0.071998 | -6.086110 | -0.373525 |
| 33 | 6  | -0.076718 | -5.158186 | 1.591982  |
| 34 | 1  | -0.187803 | -6.109259 | 2.106075  |
| 35 | 6  | -0.022723 | -3.994581 | 2.328066  |
| 36 | 1  | -0.082232 | -3.991922 | 3.411205  |
| 37 | 6  | 0.641193  | -0.377302 | -2.520787 |
| 38 | 6  | 1.036351  | -1.311029 | -1.537118 |
| 39 | 6  | 2.242571  | -2.020988 | -1.691283 |
| 40 | 1  | 2.554551  | -2.695035 | -0.902463 |
| 41 | 6  | 3.050852  | -1.831232 | -2.806148 |
| 42 | 1  | 3.984648  | -2.378886 | -2.891696 |
| 43 | 6  | 2.663176  | -0.925037 | -3.792222 |
| 44 | 1  | 3.285353  | -0.759200 | -4.666762 |
| 45 | 6  | 1.472697  | -0.218002 | -3.642621 |
| 46 | 1  | 1.172086  | 0.493897  | -4.405350 |
| 47 | 17 | 2.291389  | 0.396300  | 1.266247  |

---

## H. (Clamp)Os

Energy of optimized structure =  $-1921.72744930$  a.u.

Cartesian coordinates of optimized structure:

| Center<br>Number | Atomic<br>Number | Coordinates (Å) |           |           |
|------------------|------------------|-----------------|-----------|-----------|
|                  |                  | X               | Y         | Z         |
| 1                | 76               | 0.000751        | 0.000048  | -1.000495 |
| 2                | 8                | 1.213058        | -1.133042 | -2.167641 |
| 3                | 8                | -1.586092       | -0.482151 | -2.168146 |
| 4                | 8                | 0.376260        | 1.616280  | -2.166413 |
| 5                | 7                | 1.759979        | 0.075573  | 0.018671  |
| 6                | 7                | -0.814473       | -1.562550 | 0.017638  |
| 7                | 7                | -0.946701       | 1.485551  | 0.018102  |
| 8                | 7                | -0.000913       | -0.000444 | 2.266263  |
| 9                | 6                | 2.456959        | -1.261386 | -1.767227 |
| 10               | 6                | 2.804677        | -0.627083 | -0.531528 |
| 11               | 6                | 4.103491        | -0.814092 | -0.000196 |
| 12               | 1                | 4.365777        | -0.381813 | 0.958782  |
| 13               | 6                | 5.028315        | -1.555872 | -0.714407 |
| 14               | 1                | 6.026237        | -1.697078 | -0.309193 |
| 15               | 6                | 4.693521        | -2.135350 | -1.959973 |
| 16               | 1                | 5.440349        | -2.710131 | -2.500535 |
| 17               | 6                | 3.422143        | -1.993100 | -2.488342 |
| 18               | 1                | 3.134343        | -2.444931 | -3.432256 |
| 19               | 6                | -2.320111       | -1.495135 | -1.768601 |
| 20               | 6                | -1.945279       | -2.114898 | -0.533407 |
| 21               | 6                | -2.757623       | -3.145976 | -0.003170 |
| 22               | 1                | -2.514919       | -3.590424 | 0.955343  |
| 23               | 6                | -3.863123       | -3.573916 | -0.717578 |
| 24               | 1                | -4.485187       | -4.367221 | -0.312983 |
| 25               | 6                | -4.197215       | -2.992565 | -1.962464 |
| 26               | 1                | -5.069029       | -3.350265 | -2.503106 |
| 27               | 6                | -3.437024       | -1.963201 | -2.490028 |
| 28               | 1                | -3.683992       | -1.486874 | -3.433470 |
| 29               | 6                | -0.134847       | 2.757683  | -1.766438 |
| 30               | 6                | -0.860008       | 2.741629  | -0.532034 |
| 31               | 6                | -1.348217       | 3.960024  | -0.001733 |
| 32               | 1                | -1.855774       | 3.971387  | 0.956114  |
| 33               | 6                | -1.166069       | 5.132018  | -0.715249 |
| 34               | 1                | -1.543058       | 6.066909  | -0.310480 |
| 35               | 6                | -0.494232       | 5.131809  | -1.959383 |
| 36               | 1                | -0.367994       | 6.066027  | -2.499399 |
| 37               | 6                | 0.018373        | 3.959377  | -2.486978 |
| 38               | 1                | 0.555417        | 3.935876  | -3.429849 |
| 39               | 6                | 1.043584        | 0.960336  | 2.193895  |
| 40               | 6                | 1.965088        | 0.944841  | 1.122847  |
| 41               | 6                | 3.000000        | 1.893379  | 1.100340  |

|    |   |           |           |          |
|----|---|-----------|-----------|----------|
| 42 | 1 | 3.685395  | 1.901315  | 0.259309 |
| 43 | 6 | 3.108180  | 2.856101  | 2.102637 |
| 44 | 1 | 3.904953  | 3.592738  | 2.053264 |
| 45 | 6 | 2.181064  | 2.886628  | 3.145858 |
| 46 | 1 | 2.255988  | 3.637489  | 3.927193 |
| 47 | 6 | 1.161779  | 1.935967  | 3.189739 |
| 48 | 1 | 0.442315  | 1.930893  | 4.003442 |
| 49 | 6 | 0.308966  | -1.385171 | 2.193150 |
| 50 | 6 | -0.164738 | -2.175381 | 1.121886 |
| 51 | 6 | 0.139623  | -3.545962 | 1.099696 |
| 52 | 1 | -0.195612 | -4.143755 | 0.258603 |
| 53 | 6 | 0.919167  | -4.120634 | 2.102433 |
| 54 | 1 | 1.159057  | -5.178909 | 2.053264 |
| 55 | 6 | 1.408804  | -3.332703 | 3.145554 |
| 56 | 1 | 2.021656  | -3.772726 | 3.927018 |
| 57 | 6 | 1.094740  | -1.974862 | 3.189080 |
| 58 | 1 | 1.449961  | -1.348923 | 4.002617 |
| 59 | 6 | -1.355315 | 0.423459  | 2.193095 |
| 60 | 6 | -1.802719 | 1.228391  | 1.121586 |
| 61 | 6 | -3.141971 | 1.649270  | 1.098532 |
| 62 | 1 | -3.491891 | 2.238046  | 0.257064 |
| 63 | 6 | -4.029458 | 1.262077  | 2.101419 |
| 64 | 1 | -5.065993 | 1.583087  | 2.051723 |
| 65 | 6 | -3.591955 | 0.445230  | 3.145458 |
| 66 | 1 | -4.279548 | 0.135105  | 3.927066 |
| 67 | 6 | -2.258950 | 0.038463  | 3.189451 |
| 68 | 1 | -1.894341 | -0.581411 | 4.003456 |

## I. (Clamp)Ru

Energy of optimized structure = -1925.91469470 a.u.

Cartesian coordinates of optimized structure:

| Center<br>Number | Atomic<br>Number | Coordinates (Å) |           |           |
|------------------|------------------|-----------------|-----------|-----------|
|                  |                  | X               | Y         | Z         |
| 1                | 44               | 0.000080        | 0.000360  | -1.079432 |
| 2                | 8                | 1.153190        | -1.198939 | -2.244631 |
| 3                | 8                | -1.616505       | -0.397467 | -2.243297 |
| 4                | 8                | 0.463088        | 1.599274  | -2.243365 |
| 5                | 7                | 1.762106        | 0.038311  | -0.063635 |
| 6                | 7                | -0.847687       | -1.545747 | -0.064494 |
| 7                | 7                | -0.914354       | 1.507472  | -0.063698 |
| 8                | 7                | -0.000672       | -0.001071 | 2.167390  |
| 9                | 6                | 2.388846        | -1.326150 | -1.859684 |
| 10               | 6                | 2.770054        | -0.686095 | -0.623779 |
| 11               | 6                | 4.077807        | -0.896902 | -0.110501 |

|    |   |           |           |           |
|----|---|-----------|-----------|-----------|
| 12 | 1 | 4.357611  | -0.469486 | 0.845701  |
| 13 | 6 | 4.979034  | -1.652260 | -0.833813 |
| 14 | 1 | 5.979695  | -1.811190 | -0.442089 |
| 15 | 6 | 4.618098  | -2.229442 | -2.078407 |
| 16 | 1 | 5.351331  | -2.814802 | -2.626389 |
| 17 | 6 | 3.345596  | -2.072072 | -2.590115 |
| 18 | 1 | 3.040183  | -2.521902 | -3.529467 |
| 19 | 6 | -2.344366 | -1.404255 | -1.858924 |
| 20 | 6 | -1.979244 | -2.056197 | -0.624454 |
| 21 | 6 | -2.814910 | -3.084432 | -0.112028 |
| 22 | 1 | -2.583851 | -3.542314 | 0.843114  |
| 23 | 6 | -3.920613 | -3.485981 | -0.834681 |
| 24 | 1 | -4.558134 | -4.273754 | -0.443514 |
| 25 | 6 | -4.241749 | -2.882523 | -2.077682 |
| 26 | 1 | -5.116061 | -3.223813 | -2.625102 |
| 27 | 6 | -3.469847 | -1.858273 | -2.588589 |
| 28 | 1 | -3.707834 | -1.367197 | -3.526788 |
| 29 | 6 | -0.044367 | 2.733095  | -1.858381 |
| 30 | 6 | -0.791029 | 2.742699  | -0.623524 |
| 31 | 6 | -1.263267 | 3.980571  | -0.110696 |
| 32 | 1 | -1.775661 | 4.009349  | 0.844292  |
| 33 | 6 | -1.057526 | 5.139045  | -0.832898 |
| 34 | 1 | -1.420542 | 6.085043  | -0.441291 |
| 35 | 6 | -0.374493 | 5.115696  | -2.076014 |
| 36 | 1 | -0.232394 | 6.043738  | -2.622918 |
| 37 | 6 | 0.125642  | 3.934996  | -2.587614 |
| 38 | 1 | 0.669715  | 3.895615  | -3.525930 |
| 39 | 6 | 1.058632  | 0.944286  | 2.095935  |
| 40 | 6 | 1.987101  | 0.906809  | 1.029217  |
| 41 | 6 | 3.041115  | 1.835360  | 1.011232  |
| 42 | 1 | 3.730934  | 1.827942  | 0.173743  |
| 43 | 6 | 3.159381  | 2.800905  | 2.009826  |
| 44 | 1 | 3.969300  | 3.523265  | 1.962864  |
| 45 | 6 | 2.225812  | 2.852851  | 3.046403  |
| 46 | 1 | 2.309119  | 3.605927  | 3.824786  |
| 47 | 6 | 1.189201  | 1.920288  | 3.088755  |
| 48 | 1 | 0.465934  | 1.931740  | 3.899073  |
| 49 | 6 | 0.288377  | -1.391201 | 2.095163  |
| 50 | 6 | -0.207300 | -2.175611 | 1.027285  |
| 51 | 6 | 0.071419  | -3.552311 | 1.007355  |
| 52 | 1 | -0.278950 | -4.145283 | 0.168916  |
| 53 | 6 | 0.848974  | -4.138008 | 2.005272  |
| 54 | 1 | 1.070869  | -5.200273 | 1.956782  |
| 55 | 6 | 1.359255  | -3.356532 | 3.043366  |
| 56 | 1 | 1.969874  | -3.805718 | 3.821383  |
| 57 | 6 | 1.068257  | -1.992893 | 3.087682  |
| 58 | 1 | 1.438561  | -1.373028 | 3.899155  |
| 59 | 6 | -1.348957 | 0.444110  | 2.095168  |
| 60 | 6 | -1.779703 | 1.267527  | 1.028388  |
| 61 | 6 | -3.111013 | 1.715503  | 1.009196  |
| 62 | 1 | -3.448959 | 2.316798  | 0.171616  |



|    |   |           |           |          |
|----|---|-----------|-----------|----------|
| 63 | 6 | -4.007341 | 1.334453  | 2.006617 |
| 64 | 1 | -5.037956 | 1.674323  | 1.958585 |
| 65 | 6 | -3.586476 | 0.499716  | 3.043316 |
| 66 | 1 | -4.281060 | 0.194699  | 3.820779 |
| 67 | 6 | -2.260387 | 0.068649  | 3.086915 |
| 68 | 1 | -1.909268 | -0.563731 | 3.897262 |

---

**J.** *trans*-[(Clip)Os(py)<sub>2</sub>]<sup>+</sup>

Energy of optimized structure = -1771.33785186 a.u.

Cartesian coordinates of optimized structure:

| Center<br>Number | Atomic<br>Number | Coordinates (Å) |           |           |
|------------------|------------------|-----------------|-----------|-----------|
|                  |                  | X               | Y         | Z         |
| 1                | 76               | 0.000000        | 0.000000  | 0.715589  |
| 2                | 8                | 0.149475        | -1.572515 | 2.071483  |
| 3                | 7                | 0.236226        | -1.544632 | -0.518882 |
| 4                | 6                | -0.069406       | -2.735049 | 1.489544  |
| 5                | 6                | 0.000000        | -2.782685 | 0.053138  |
| 6                | 6                | -0.162366       | -4.012286 | -0.627727 |
| 7                | 1                | -0.126999       | -4.037048 | -1.712218 |
| 8                | 6                | -0.398995       | -5.163815 | 0.100383  |
| 9                | 1                | -0.549431       | -6.107498 | -0.414055 |
| 10               | 6                | -0.457211       | -5.117928 | 1.512657  |
| 11               | 1                | -0.637129       | -6.035170 | 2.066013  |
| 12               | 6                | -0.293826       | -3.927311 | 2.204711  |
| 13               | 1                | -0.332509       | -3.887125 | 3.288563  |
| 14               | 6                | 0.607731        | -0.435620 | -2.706177 |
| 15               | 6                | 0.931931        | -1.432876 | -1.748495 |
| 16               | 6                | 2.044379        | -2.272181 | -1.964301 |
| 17               | 1                | 2.290827        | -3.010841 | -1.209707 |
| 18               | 6                | 2.842769        | -2.140187 | -3.093741 |
| 19               | 1                | 3.702262        | -2.790527 | -3.225414 |
| 20               | 6                | 2.539302        | -1.160091 | -4.039726 |
| 21               | 1                | 3.154765        | -1.036755 | -4.925606 |
| 22               | 6                | 1.435301        | -0.334444 | -3.841285 |
| 23               | 1                | 1.197159        | 0.422177  | -4.582585 |
| 24               | 7                | 2.106339        | 0.311165  | 0.891359  |
| 25               | 6                | 2.868171        | 0.858803  | -0.081030 |
| 26               | 1                | 2.365250        | 1.078840  | -1.013804 |
| 27               | 6                | 4.220491        | 1.125077  | 0.097884  |
| 28               | 1                | 4.788328        | 1.565723  | -0.714475 |
| 29               | 6                | 4.815866        | 0.821343  | 1.321716  |
| 30               | 1                | 5.869588        | 1.021865  | 1.489856  |
| 31               | 6                | 4.030294        | 0.252670  | 2.324412  |
| 32               | 1                | 4.447108        | -0.004692 | 3.292156  |
| 33               | 6                | 2.684835        | 0.010297  | 2.077061  |
| 34               | 1                | 2.034456        | -0.442416 | 2.815543  |
| 35               | 8                | -0.149475       | 1.572515  | 2.071483  |
| 36               | 7                | -0.236226       | 1.544632  | -0.518882 |
| 37               | 6                | 0.069406        | 2.735049  | 1.489544  |

|    |   |           |           |           |
|----|---|-----------|-----------|-----------|
| 38 | 6 | 0.000000  | 2.782685  | 0.053138  |
| 39 | 6 | 0.162366  | 4.012286  | -0.627727 |
| 40 | 1 | 0.126999  | 4.037048  | -1.712218 |
| 41 | 6 | 0.398995  | 5.163815  | 0.100383  |
| 42 | 1 | 0.549431  | 6.107498  | -0.414055 |
| 43 | 6 | 0.457211  | 5.117928  | 1.512657  |
| 44 | 1 | 0.637129  | 6.035170  | 2.066013  |
| 45 | 6 | 0.293826  | 3.927311  | 2.204711  |
| 46 | 1 | 0.332509  | 3.887125  | 3.288563  |
| 47 | 6 | -0.607731 | 0.435620  | -2.706177 |
| 48 | 6 | -0.931931 | 1.432876  | -1.748495 |
| 49 | 6 | -2.044379 | 2.272181  | -1.964301 |
| 50 | 1 | -2.290827 | 3.010841  | -1.209707 |
| 51 | 6 | -2.842769 | 2.140187  | -3.093741 |
| 52 | 1 | -3.702262 | 2.790527  | -3.225414 |
| 53 | 6 | -2.539302 | 1.160091  | -4.039726 |
| 54 | 1 | -3.154765 | 1.036755  | -4.925606 |
| 55 | 6 | -1.435301 | 0.334444  | -3.841285 |
| 56 | 1 | -1.197159 | -0.422177 | -4.582585 |
| 57 | 7 | -2.106339 | -0.311165 | 0.891359  |
| 58 | 6 | -2.868171 | -0.858803 | -0.081030 |
| 59 | 1 | -2.365250 | -1.078840 | -1.013804 |
| 60 | 6 | -4.220491 | -1.125077 | 0.097884  |
| 61 | 1 | -4.788328 | -1.565723 | -0.714475 |
| 62 | 6 | -4.815866 | -0.821343 | 1.321716  |
| 63 | 1 | -5.869588 | -1.021865 | 1.489856  |
| 64 | 6 | -4.030294 | -0.252670 | 2.324412  |
| 65 | 1 | -4.447108 | 0.004692  | 3.292156  |
| 66 | 6 | -2.684835 | -0.010297 | 2.077061  |
| 67 | 1 | -2.034456 | 0.442416  | 2.815543  |

---

## References

---

- (S1) D. Das, H. Agarwala, A. D. Chowdhury, T. Patra, S. M. Mobin, B. Sarkar, W. Kaim and G. K. Lahiri, *Chem. Eur. J.*, 2013, **19**, 7384-7394.
- (S2) D. Das, T. K. Mondal, S. M. Mobin and G. K. Lahiri, *Inorg. Chem.*, 2009, **48**, 9800-9810.
- (S3) H. Agarwala, D. Das, S. M. Mobin, T. K. Mondal and G. K. Lahiri, *Inorg. Chim. Acta*, 2011, **374**, 216-225.
- (S4) D. Das, A. K. Das, B. Sarkar, T. K. Mondal, S. M. Mobin, J. Fiedler, S. Zálíš, F. A. Urbanos, R. Jiménez-Aparicio, W. Kaim and G. K. Lahiri, *Inorg. Chem.*, 2009, **48**, 11853-11864.
- (S5) S. Maity, S. Kundu, S. Bera, T. Weyhermüller and P. Ghosh, *Eur. J. Inorg. Chem.*, 2016, 3691-3697.
- (S6) D. Das, T. K. Mondal, A. D. Chowdhury, F. Weisser, D. Schweinfurth, B. Sarkar, S. M. Mobin, F. A. Urbanos, R. Jimenez-Aparicio and G. K. Lahiri, *Dalton Trans.*, 2011, **40**, 8377-8390.
- (S7) K. N. Mitra, S.-M. Peng and S. Goswami, *Chem. Commun.*, 1998, 1685-1686.
- (S8) R. Hübner, B. Sarkar, J. Fiedler, S. Zálíš and W. Kaim, *Eur. J. Inorg. Chem.*, 2012, 3569-3576.
- (S9) B. Bagh, D. L. J. Broere, M. A. Siegler and J. I. van der Vlugt, *Angew. Chem. Int. Ed.*, 2016, **55**, 8381-8385.
- (S10) A. K. Das, B. Sarkar, C. Duboc, S. Strobel, J. Fiedler, S. Zálíš, G. K. Lahiri and W. Kaim, *Angew. Chem. Int. Ed.*, 2009, **48**, 4242-4245.
- (S11) A. K. Das, B. Sarkar, J. Fiedler, S. Zálíš, I. Hartenbach, S. Strobel, G. K. Lahiri and W. Kaim, *J. Am. Chem. Soc.*, 2009, **131**, 8895-8902.
- (S12) M. R. Ringenberg, M. J. Nilges, T. B. Rauchfuss and S. R. Wilson, *Organometallics*, 2010, **29**, 1956-1965.
- (S13) J. Rochford, M.-K. Tsai, D. J. Szalda, J. L. Boyer, J. T. Muckerman and E. Fujita, *Inorg. Chem.*, 2010, **49**, 860-869.
- (S14) P. Ghosh, S. Maity, S. Kundu and S. Mondal, *Inorg. Chem.*, 2017, **56**, 3363-3376.
- (S15) M. Bublin, D. Schweinfurth, F. Ehret, S. Zálíš, H. Kvapilová, J. Fiedler, Q. Zeng, F. Hartl and W. Kaim, *Organometallics*, 2014, **33**, 4973-4985.
- (S16) A. K. Das, R. Hübner, B. Sarkar, J. Fiedler, S. Zálíš, G. K. Lahiri and W. Kaim, *Dalton Trans.*, 2012, **41**, 8913-8921.
- (S17) D. Das, T. M. Scherer, A. Das, T. K. Mondal, S. M. Mobin, J. Fiedler, J. L. Priego, R. Jimenez-Aparicio, W. Kaim and G. K. Lahiri, *Dalton Trans.*, 2012, **41**, 11675-11683.
- (S18) D. Das, B. Sarkar, T. K. Mondal, S. M. Mobin, J. Fiedler, W. Kaim and G. K. Lahiri, *Inorg. Chem.*, 2011, **50**, 7090-7098.

---

(S19) J. Xiang, W.-L. Man, S.-M. Yiu, S.-M. Peng, T.-C. Lau, *Chem. Eur. J.*, 2011, **17**, 13044-13051.
